# Supplementary material for: Elevated cytokine levels in tears and saliva of patients with primary Sjögren’s syndrome correlate with clinical ocular and oral manifestations
Source: PubMed Central journal article supplement (PMC6513950; doi:10.1038/s41598-019-43714-5), 2019-05-13
Supplement: 41598_2019_43714_MOESM1_ESM.pdf [file 41598_2019_43714_MOESM1_ESM.pdf]

Supplementary Figures S1 and S2

Manuscript title: **Elevated cytokine levels in tears and saliva of patients with primary Sjögren's syndrome correlate with clinical ocular and oral manifestations**

Xiangjun Chen<sup>1,2\*</sup>, Lara A. Aqrawi<sup>1</sup>, Tor Paaske Utheim<sup>2,3,4</sup>, Behzod Tashbayev<sup>1,2</sup>, Øygunn Aass Utheim<sup>2</sup>, Sjur Reppe<sup>4</sup>, Lene Hystad Hove<sup>5</sup>, Bente Brokstad Herlofson<sup>1</sup>, Preet Bano Singh<sup>1</sup>, Øyvind Palm<sup>6</sup>, Hilde Kanli Galtung<sup>3</sup>, Janicke Cecilie Liaaen Jensen<sup>1</sup>

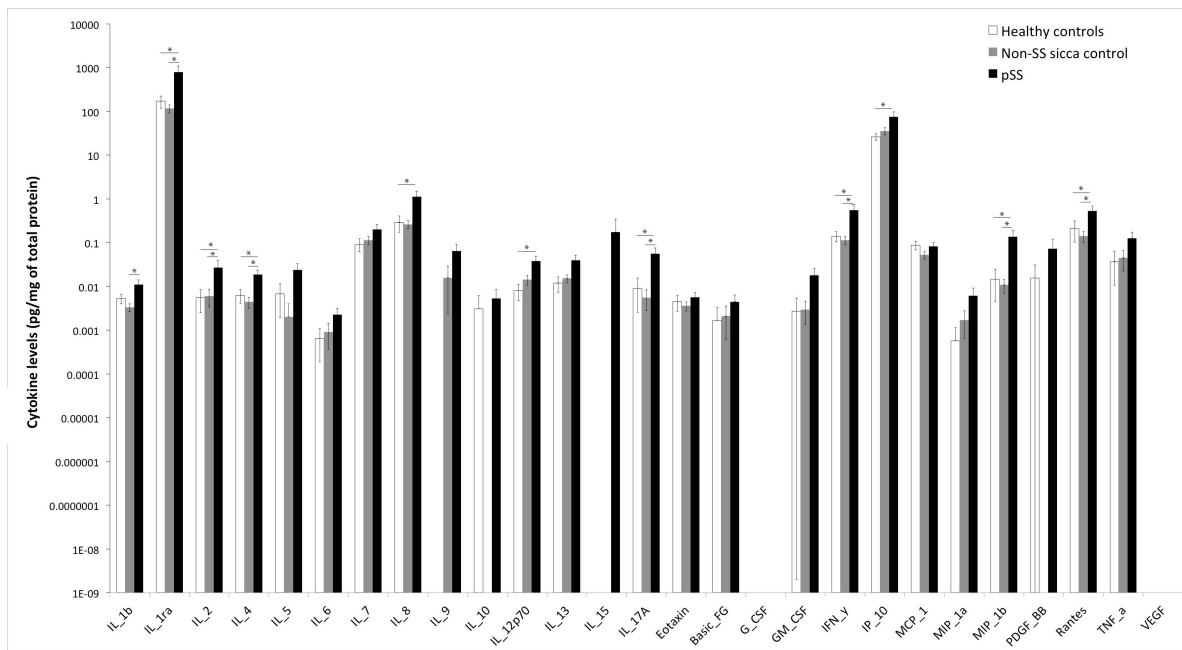

Figure S1. Comparison of tear cytokine levels adjusted by total protein. Intergroup difference is considered significant at  $*p < 0.05$ .

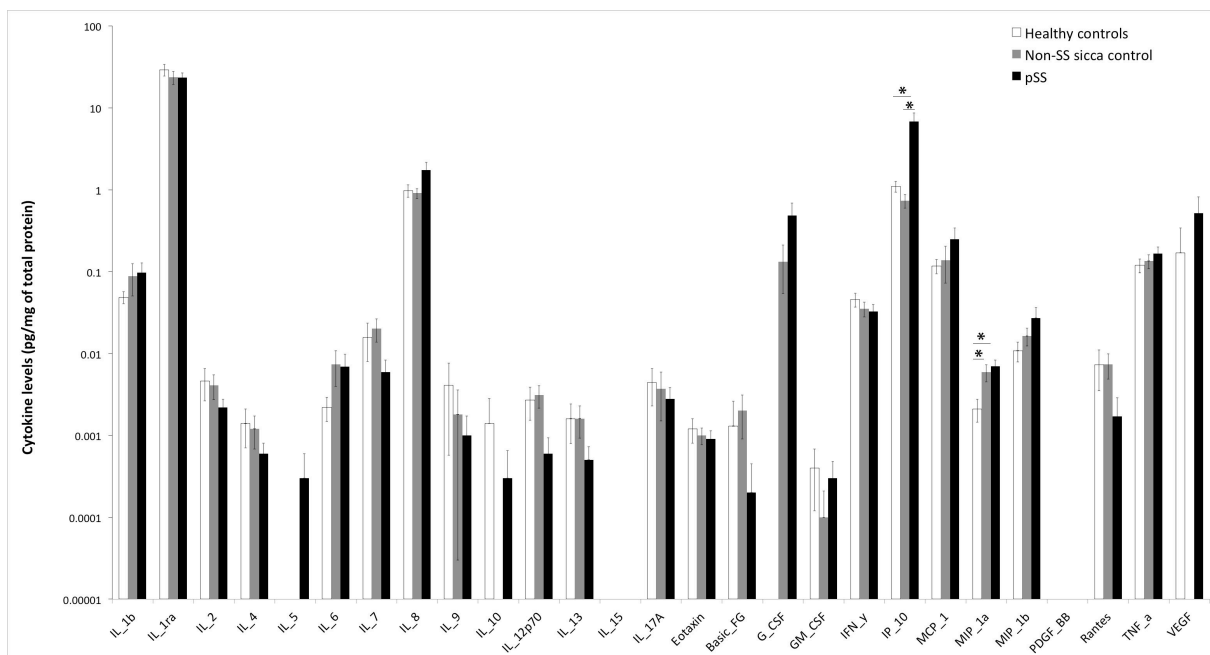

Figure S2. Comparison of salivary cytokine levels adjusted by total protein. Intergroup difference is considered significant at  $*p < 0.05$ .
